# Supplementary material
Source: PubMed Central journal article supplement (PMC5019199)
Supplement: NIHMS69490-supplement-Supplementary_information.pdf [file NIHMS69490-supplement-Supplementary_information.pdf]

# Supplementary Information: Lipid vesicles trigger $\alpha$ -synuclein aggregation by stimulating primary nucleation

Céline Galvagnion, Alexander K. Buell, Georg Meisl, Thomas C.T. Michaels, Michele Vendruscolo, Tuomas P.J. Knowles and Christopher M. Dobson\*

Department of Chemistry, University of Cambridge, Lensfield Road, Cambridge CB2 1EW, UK

\*author to whom correspondence should be addressed: [cmd44@cam.ac.uk](mailto:cmd44@cam.ac.uk)

## Supplementary Results

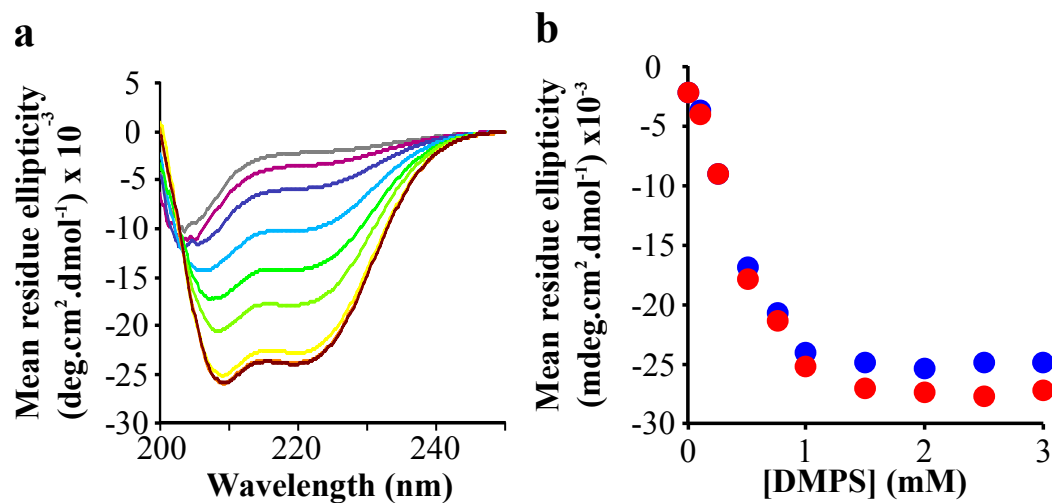

Supplementary Figure 1:  $\alpha$ -syn binding to DMPS SUVs and LUVs monitored by Circular Dichroism (CD). a) CD spectra of  $\alpha$ -syn (50  $\mu$ M) measured in the absence (grey) and in the presence of 0.1 (purple), 0.25 (blue), 0.5 (cyan), 0.75 (green), 1 (light green), 1.5 (yellow), 2 (orange) and 3 mM (brown) DMPS. b) Change in the CD signal of  $\alpha$ -syn measured at 222 nm in the presence of increasing concentration of DMPS in the form of either SUVs (blue) or LUVs (red).

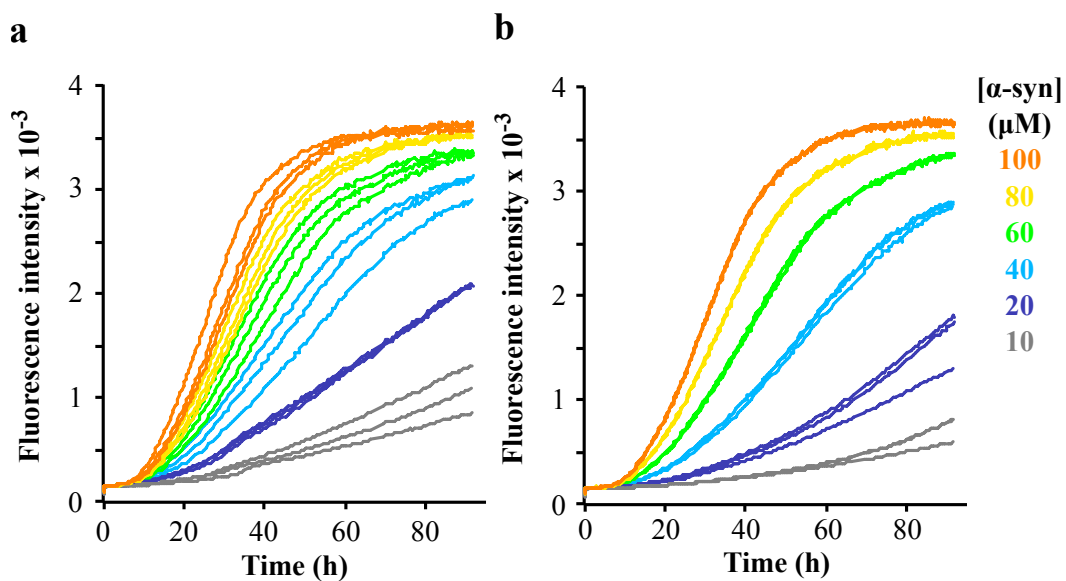

Supplementary Figure 2: Stimulation of  $\alpha$ -syn aggregation by DMPS SUVs and LUVs. Triplicates of the change in the fluorescence signal of ThT when increasing concentrations of  $\alpha$ -syn (10 (grey), 20 (blue), 40 (cyan), 60 (green), 80 (yellow), 100  $\mu$ M (orange)) were incubated in the presence of a constant concentration of DMPS (100  $\mu$ M) in the form of either SUVs (a) or LUVs (b).

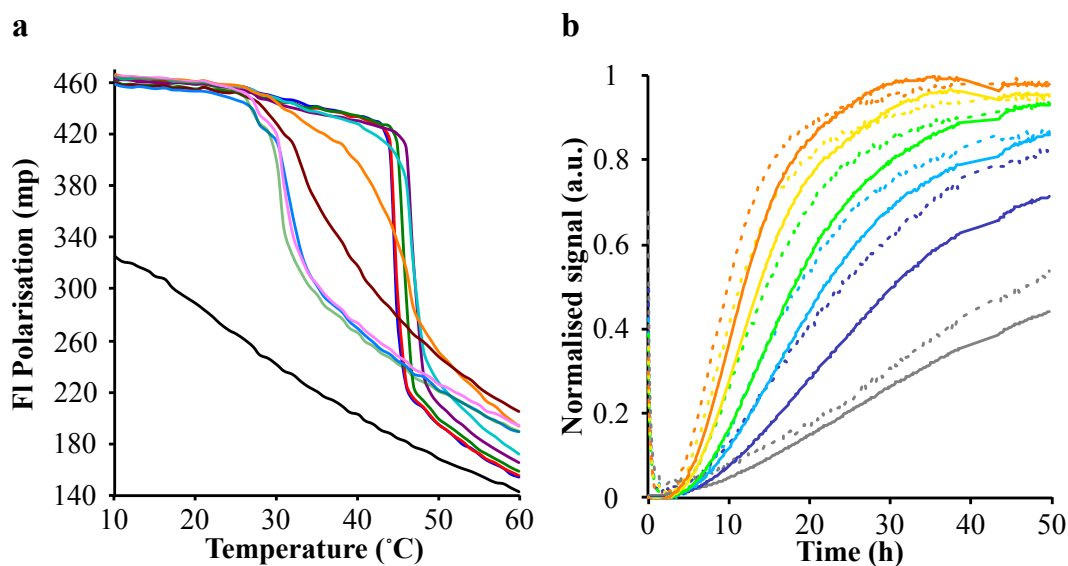

Supplementary Figure 3: Membrane fluidity monitored via fluorescence polarisation of membrane bound 1,6-diphenylhexa-1,3,5-triene (DPH). a) Change in the fluorescence polarisation (FP) of DPH embedded in the membrane of DMPS SUVs with temperature monitored in the absence (blue), the presence of 0.5 (red), 1 (green), 2.5 (purple), 5 (cyan), 10 (orange), 20 (brown), 40 (light blue), 60 (pink) and 80  $\mu\text{M}$  (light green)  $\alpha$ -syn and in the presence of 10% Triton X-100 (black) (used to solubilise the DMPS lipids). b) Change in both the ThT fluorescence (continuous line) and the FP of DPH (dotted line) monitored as a function of time when increasing concentrations of  $\alpha$ -syn (25 (grey), 50 (blue), 75 (cyan), 100 (green), 150 (yellow), 200  $\mu\text{M}$  (orange)) were incubated in the presence of a constant concentration of DMPS (600  $\mu\text{M}$ ).

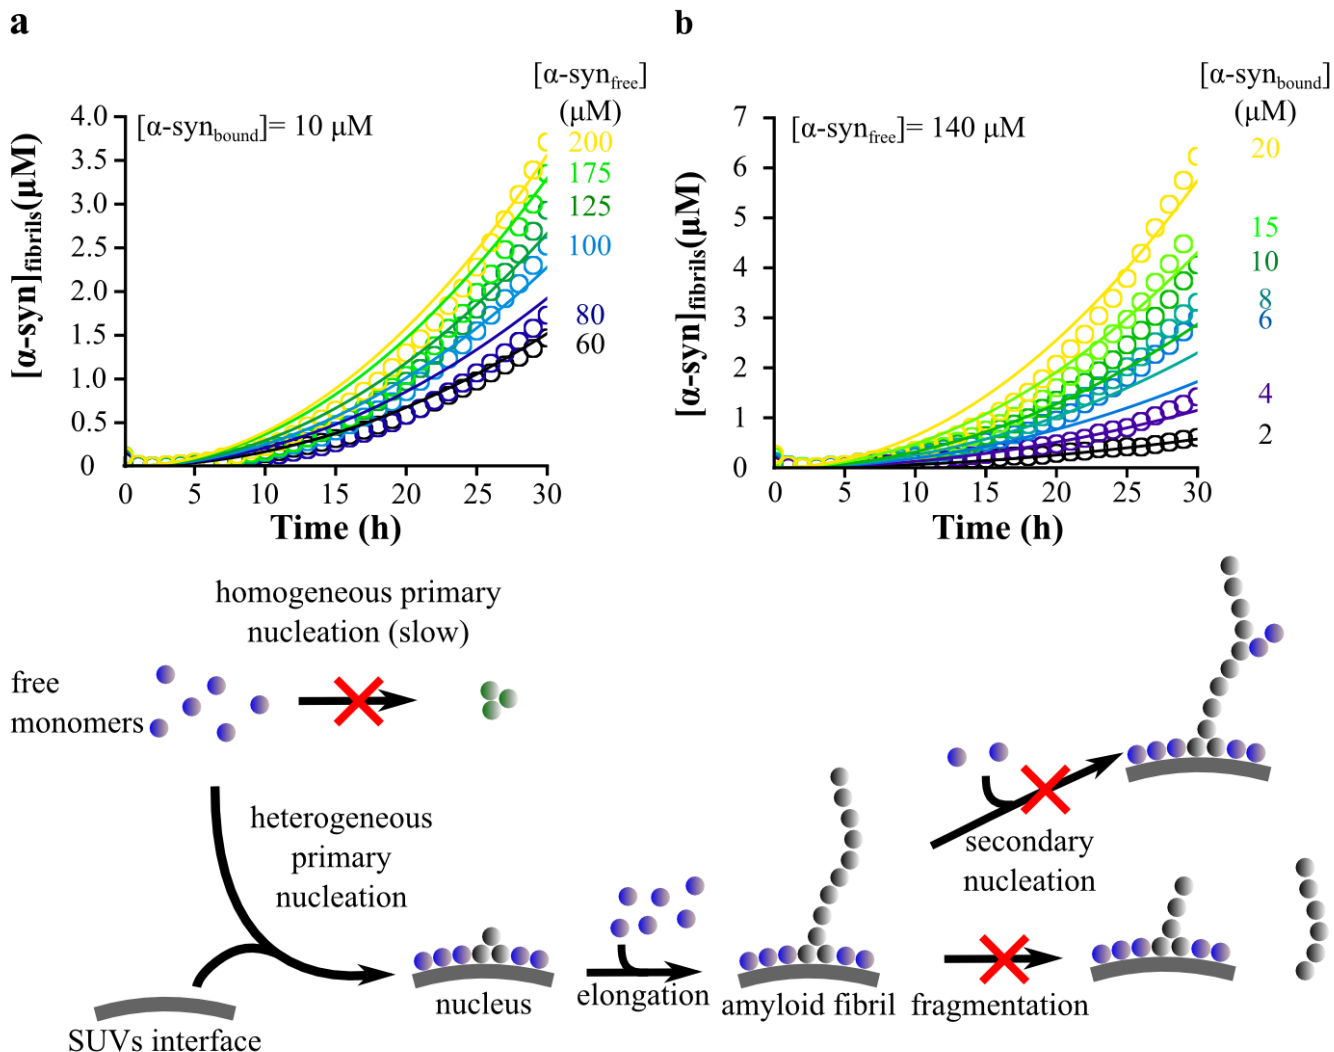

Supplementary Figure 4: Global fits of the early time-points of the  $\alpha\text{-syn}$  aggregation curves obtained for the different monomer and DMPS concentrations to the one-step nucleation mechanism ( $k_n k_+ = 4.7 \cdot 10^{-6} \text{ M}^{-(n+1)} \text{ s}^{-2}$ ,  $K_M = 125 \mu\text{M}$ ,  $n = 0.2$ ). The data set a and b correspond to the early time-points of the aggregation curves of  $\alpha\text{-syn}$  when increasing concentrations of  $\alpha\text{-syn}$  (60 (black), 80 (blue), 100 (light blue), 125 (dark green), 175 (green), 200  $\mu\text{M}$  (yellow)) were incubated in the presence of a constant concentration of DMPS (300  $\mu\text{M}$ ) (a, see Fig. 4a of the main manuscript for the full time curves) and when free monomeric  $\alpha\text{-syn}$  (140  $\mu\text{M}$ ) was incubated in the presence of increasing concentrations of DMPS (60 (black), 120 (purple), 180 (dark blue), 240 (light blue), 300 (dark green), 450 (light green), 600 (yellow), 1200 (orange)  $\mu\text{M}$ ) (b, see Fig. 4b of the main manuscript for the full time curves), respectively. The "one-step" nucleation model is shown under the curves.

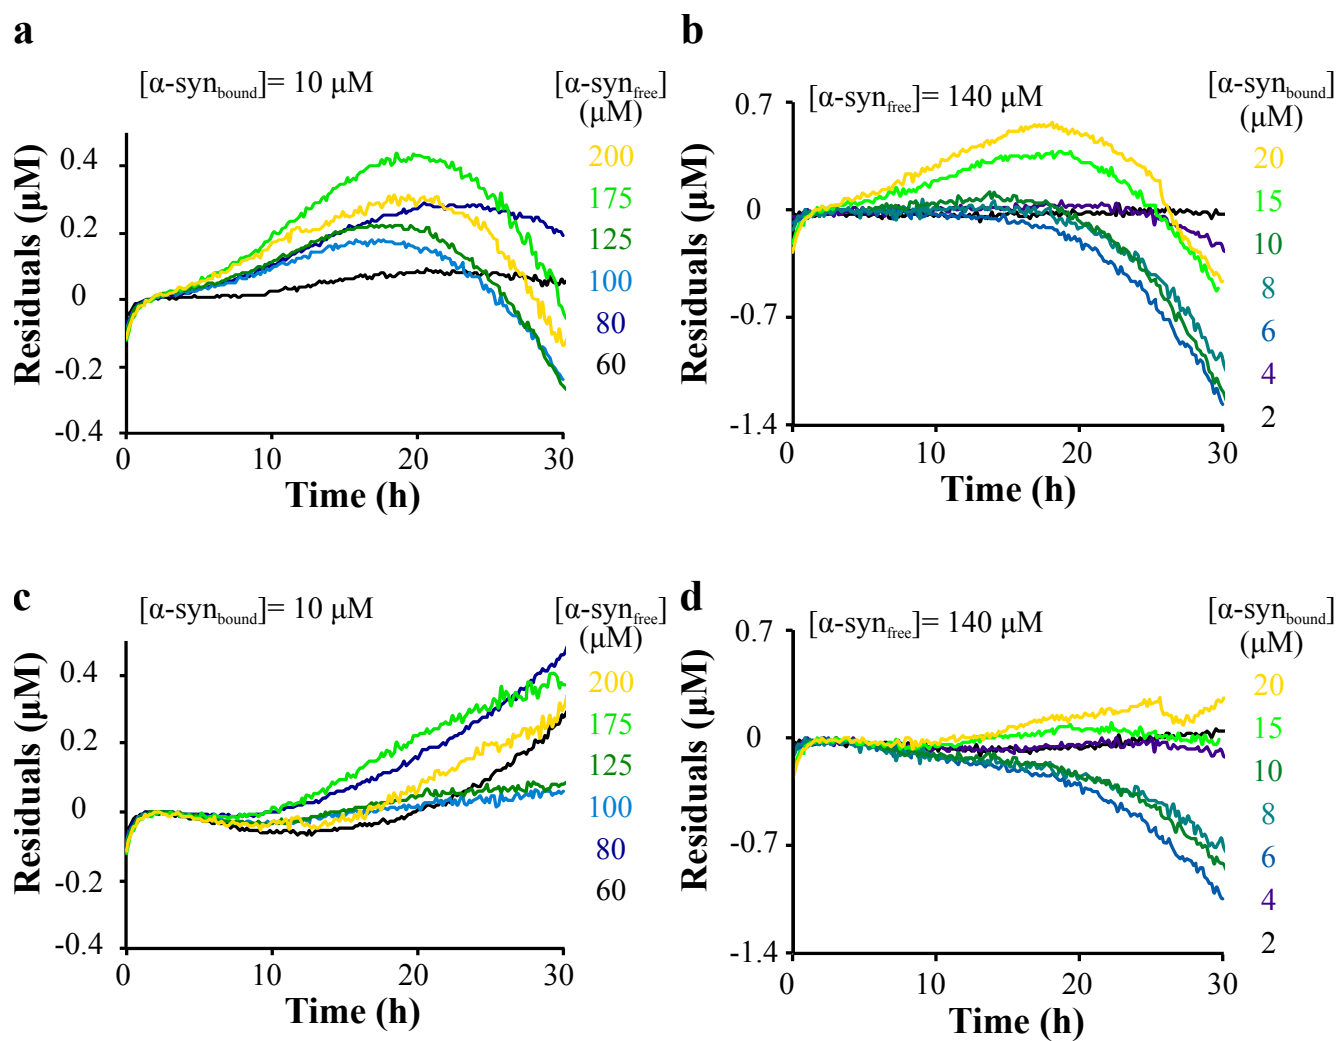

Supplementary Figure 5: Residuals of the fits of the early time-points of  $\alpha$ -syn aggregation curves obtained for the different monomer and DMPS concentrations to the one-step nucleation (a,b) and two-step nucleation (c,d) models. The mean squared error of the fits to a single step and a two-step nucleation models are  $6.14 \cdot 10^{-14}$  and  $3.72 \cdot 10^{-14}$ , respectively, and illustrate that the two-step nucleation model better describe our entire set of data. The corresponding fits are displayed in Fig. 6 of the main text and Supplementary Fig. 4, respectively.

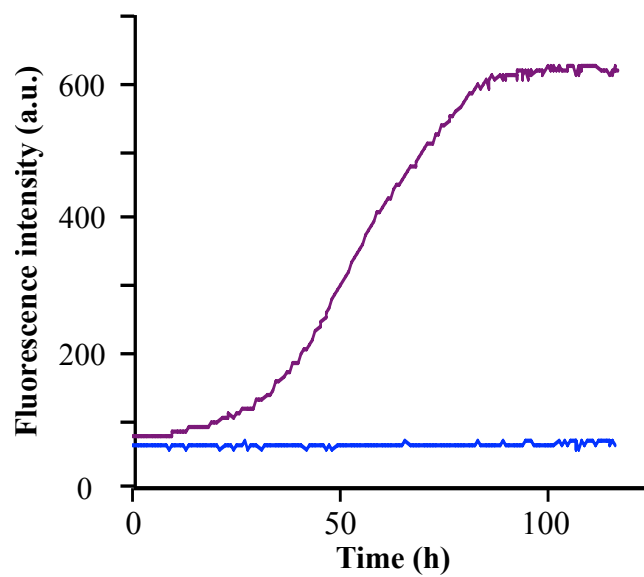

Supplementary Figure 6: Change in the fluorescence signal of ThT when 140  $\mu$ M  $\alpha$ -syn was incubated in the absence (blue) and in the presence of 60  $\mu$ M DMPS (purple).
